# Supplementary material for: Electronic nature of linkers-based conjugated microporous polymers: a sustainable approach to enhance CO2 capture
Source: Royal Society of Chemistry journal article supplement (doi:10.1039/d4nj02404d), 2024-01-01
Supplement: d4nj02404d1.pdf [file d4nj02404d1.pdf]

Supporting Information

Electronic Nature of Linkers Based Conjugated Microporous Polymers:  
A Sustainable Approach to Enhance CO<sub>2</sub> Capture

Mohammed G. Kotp, Ahmed F. M. EL-Mahdy,\* Mitch Ming-Chi Chou, and  
Shiao-Wei Kuo\*

Department of Materials and Optoelectronic Science, Center of Crystal Research, National  
Sun Yat-Sen University, Kaohsiung, 80424, Taiwan

Corresponding Author:

E-mail: [ahmedelmahdy@mail.nsysu.edu.tw](mailto:ahmedelmahdy@mail.nsysu.edu.tw) (A. F. M. EL-Mahdy), and

[kuosw@faculty.nsysu.edu.tw](mailto:kuosw@faculty.nsysu.edu.tw) (S. W. Kuo)

## S1 Instrumentation

### *S.1.1 Fourier transform infrared (FTIR) scans.*

Classical KBr plates were exploited for FTIR sweeps through a 27 Bruker Tensor spectrophotometer. Resolution scales were modulated by 4 cm<sup>-1</sup>.

### *S.1.2 <sup>1</sup>H and <sup>13</sup>C NMR scans.*

NMR profiles were swept through An INOVA 500 machine employing DMSO-d<sub>6</sub> as well as CDCl<sub>3</sub> as solvents, in addition to employing Tetramethylsilane (TMS) as external standard. Chemical shifts are shown in part per million (ppm).

### *S.1.3 Thermal gravimetric analysis (TGA).*

TGA of CMPs were provided under N<sub>2</sub> stream using TA Q-50 instrument. A closed Pt cane was used as sample holder, after that temperature was raised up to 800 °C under ramp of 20 °C min<sup>-1</sup> at N<sub>2</sub> stream of an average of 50 ml min<sup>-1</sup>.

### *S.1.4 Solid state nuclear magnetic resonance (SSNMR).*

The Bruker Avance 400 NMR detector connected to the probe of Bruker magic-angle-spinning (MAS) was employed for recording SSNMR profiles at a running of 32,000 scans.

### *S.1.5 Surface area, and porous features.*

Micromeritics ASAP 2020 surface area as well as porosity analyzer were employed for evaluating surface area and porosimetry of every CMP. Ultrapure N<sub>2</sub> stream (up to ca. 1 atm) as well as a liquified N<sub>2</sub> bath extremely facilitated the obtaining of nitrogenic isotherms.

### *S.1.6 X-ray photoelectron spectroscopy (XPS) spectra.*

Thermo Fisher scientific ESCALAB 250 connected a micro monochromatic Al Kα X-ray lamp (15 kV) with a dual-focusing full 180° spherical sector electron analyzer determined XPS scans.

### *S.1.7 Field-emission scanning electron microscopy (FE-SEM).*

A JEOL JSM-7610F of SEM used for visualizing FE-SEM images. Notably, CMPs were sputtered using Pt for 150 s for clear visualization.

### *S.1.8 Transmission electron microscopy (TEM).*

TEM visualizations of the obtained CMPs were checked through a JEOL-2100 scanning electron microscope after exposing them to 200 KV.

## **S2 Synthesis methodologies**

### *S.2.1 $N^1,N^1,N^4,N^4$ -Tetrakis(4-bromophenyl)-*p*-phenylenediamine (TPPDA-4Br)*

According to earlier reported work, the bromination of the pristine  $N^1,N^1,N^4,N^4$ -tetraphenyl-*p*-phenylenediamine (TPPDA) was achieved as briefed in [Scheme S1](#). Briefly, the TPPDA (2.42 mmol, 1 g) and dry DMF (40 mL) were mixed into a 50 mL round bottom flask. After that, *N*-Bromosuccinimide (NBS) (10.8 mmol, 1.94 g) was solved in a 20 mL of dry DMF which then dropped wisely to the TPPDA solution at 0°C as well as gentle magnetic stirring overnight. Finally, the flask ingredients were poured onto icy water, and then filtered, rinsed sever times via ethanol (1.64 g, 93% yield). FTIR: 1576, 1499, 1016  $\text{cm}^{-1}$  ([Fig. S1](#)). The  $^1\text{H}$ -NMR ( $\text{CDCl}_3$ , 25 °C, 600 MHz): 7.35 (d, 8H), 6.94 (m, 12H).  $^{13}\text{C}$  NMR ( $\text{CDCl}_3$ , 25 °C, 500 MHz): 132.3, 125.5, 125.2 ppm. HRMS (ESI):  $m/z$  calculated for  $\text{C}_{30}\text{H}_{20}\text{Br}_4\text{N}_2$ : 728.1; found 728.69 ([Fig. S2](#)).

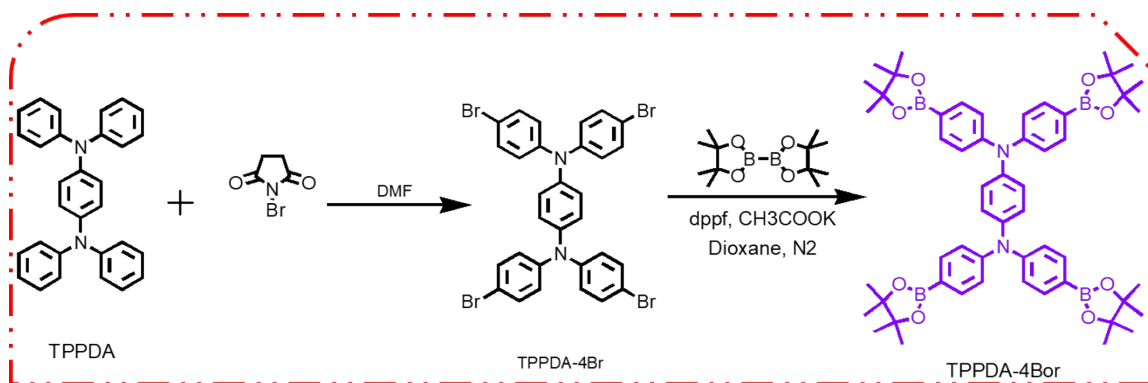

*Scheme S1 Schematic synthesis of TPPDA, and TPPDA-4Bor*

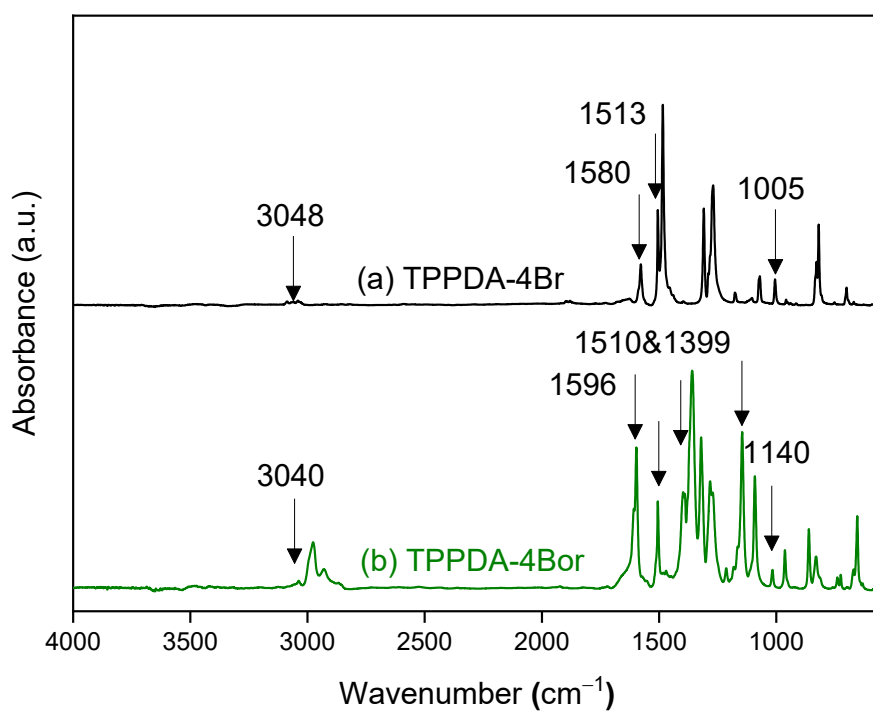

*Fig. S1 FTIR of TPPDA-4Br, and TPPDA-4Bor*

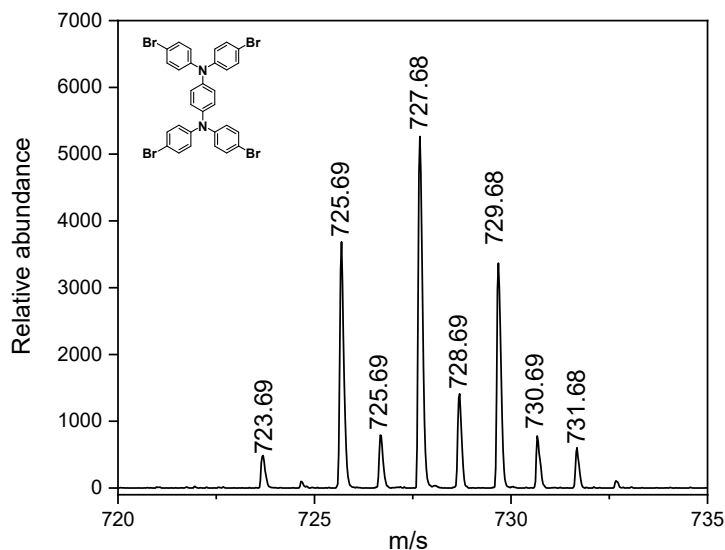

Fig. S2 Mass spectroscopy analysis of TPPDA-4Br

### S.2.2 $N^1, N^1, N^4, N^4$ -Tetrakis(4-(4,4,5,5-tetramethyl-1,3,2-dioxaborolan-2-yl)phenyl)-*p*-phenylene diamine (TPPDA-4Br)

In a couple-neck flask, the previously designed TPPDA-4Br (1.2g, 5.8 mmol) was charged with the bis(pinacolato)diboron (2.6 g, 35.96 mmol), potassium acetate (0.5 g, 35.7 mmol), and 1,1'-ferrocenediyl-bis(diphenylphosphine) (dppf) (105 mg, 0.5 mmol) and then these powders were degassed for 15 min. Afterwards, a dioxane (50 mL) was charged to the flask under a nitrogen pressure then the reaction was kept at 110° C for 48 hours under refluxing conditions and stirring. Afterwards, the solution was poured onto icy water, then separated, rinsed, dried using ethanol as well. Column chromatography was applied ensuring the complete purging of the moiety via a co-solvent of THF and hexane of a ratio of 3:7. Notably, the precipitate was dried at 70° C (1.33 g, yield, 88 %). FTIR: 2976, 1503, 1392, 1268, 1144, 1015  $\text{cm}^{-1}$  (Fig. S1).  $^1\text{H-NMR}$  (DMSO, 25 °C, 600 MHz): 7.17 (d,  $J$  = 8.0 Hz, 8H), 7.06 (d,  $J$  = 8.0 Hz, 8H), and 6.96 (d,  $J$  = 8.0 Hz, 4H) (Fig. S3).  $^{13}\text{C-NMR}$  ( $\text{CDCl}_3$ , 25 °C, 500 MHz): 141.75, 133.25, 127.74, 121.78, 107.79, 83.92, 23.97 ppm (Fig. S4). HRMS:  $m/z$  calculated for  $\text{C}_{54}\text{H}_{68}\text{B}_4\text{N}_2\text{O}_8$ : 916.37; found 916.51 (Fig. S5).

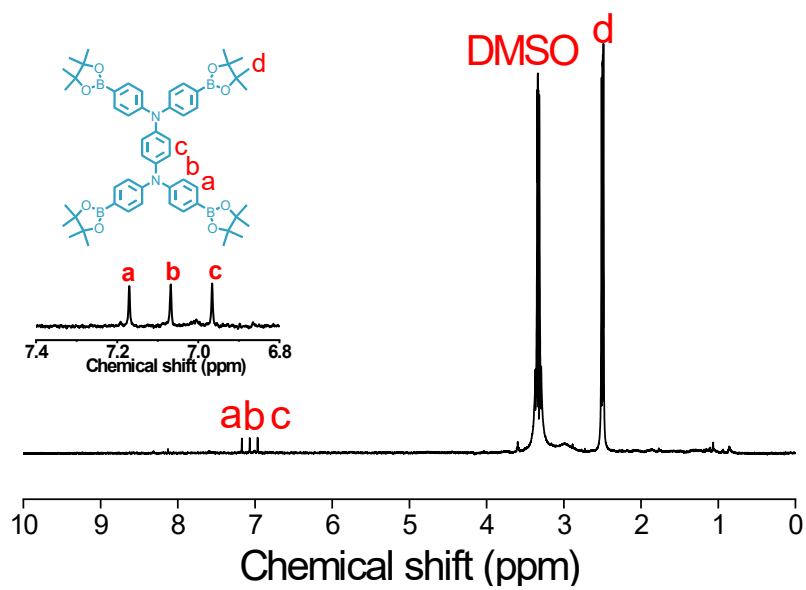

Fig. S3 <sup>1</sup>H NMR spectra of TPPDA-4Bor

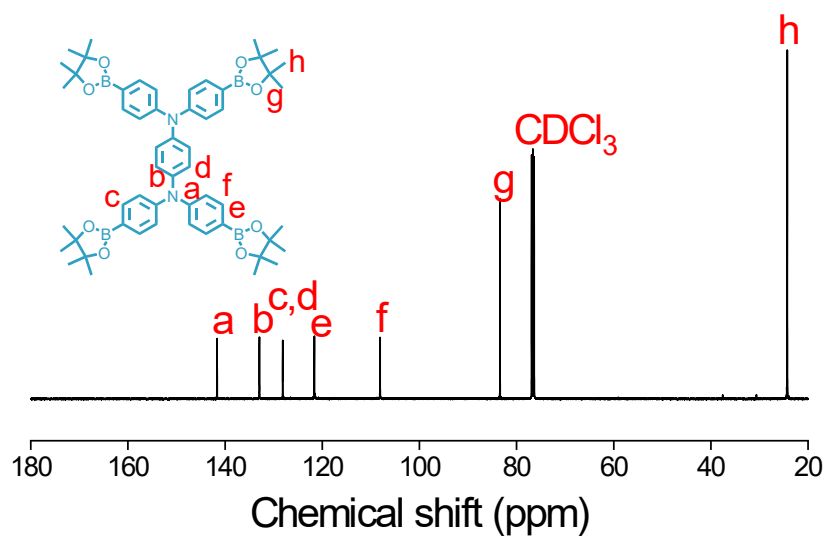

Fig. S4 <sup>13</sup>C NMR spectra of TPPDA-4Bor

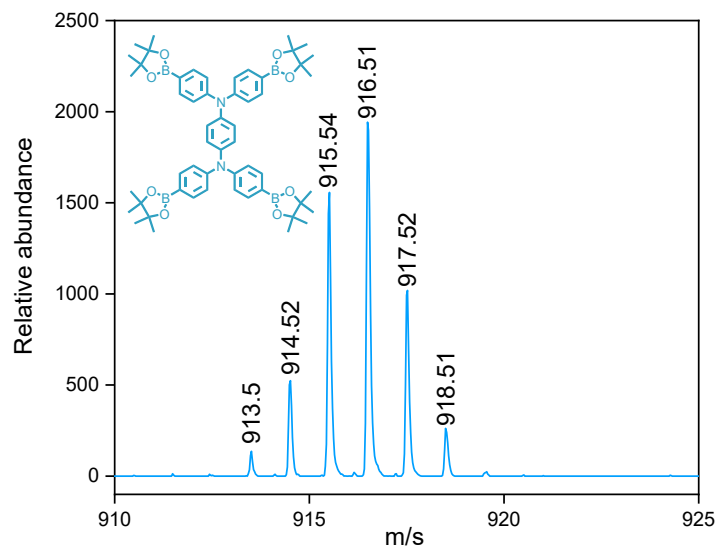

Fig. S5 Mass spectroscopy analysis of TPPDA-4Bor

### S.2.3 Synthesis of Tris(4-bromophenyl)amine (TPA-3Br)

The TPA-3Br was designed and scanned according to the earlier work. Briefly, as clarified in [scheme S2](#), a 250 mL flask was supplemented with triphenylamine (5 g, 4.08 mmol), DMF (120 mL) under icy and dark environment. A solution of NBS (12 g, 12.32 mmol), and DMF (60mL) was dropped wisely into the reaction flask under continuous magnetic stirring which lasted overnight at ambient temperature. After that, the yield was separated with dichloromethane (DCM) which then rinsed via methanol affording a white powder. FTIR scan: 3064, 1570, 1266, and 816  $\text{cm}^{-1}$  ([Fig. S6](#)).  $^1\text{H}$  NMR scan (400 MHz, 25  $^{\circ}\text{C}$ ,  $\text{CDCl}_3$ ):  $\delta$  7.35 ppm (d, 6H), and 6.921 ppm (d, 6H) ([Fig. S7](#)).  $^{13}\text{C}$  NMR scan ( $\text{CDCl}_3$ , 25  $^{\circ}\text{C}$ , 500 MHz): 146.7 ppm, 132.8, 126.01, and 116.38 ppm ([Fig. S8](#)).

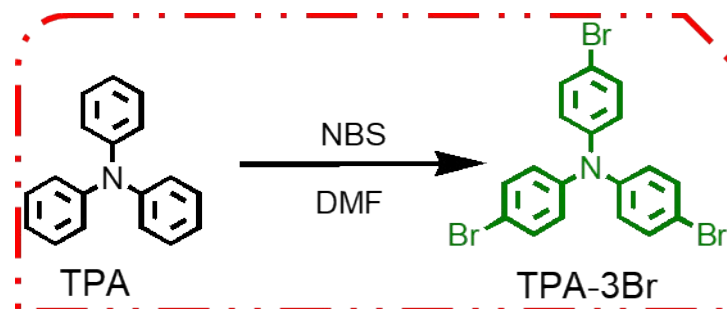

*Scheme S2 Schematic design of TPA-3Br*

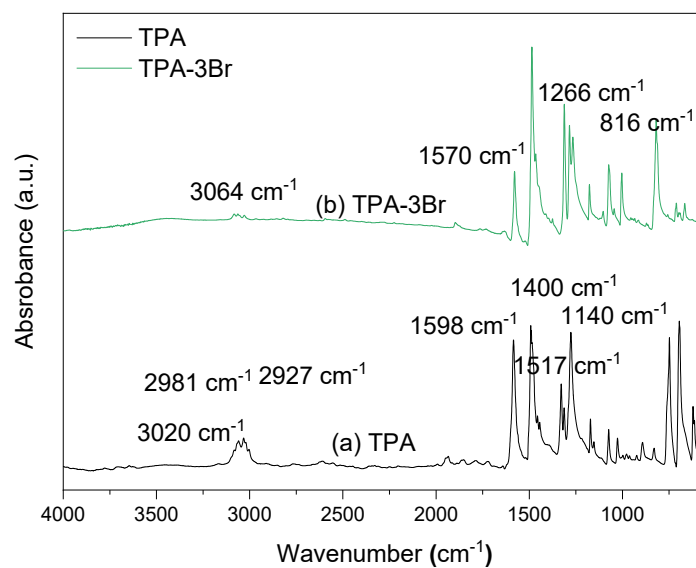

*Fig. S6 FTIR of Pristine TPA, and TPA-3Br*

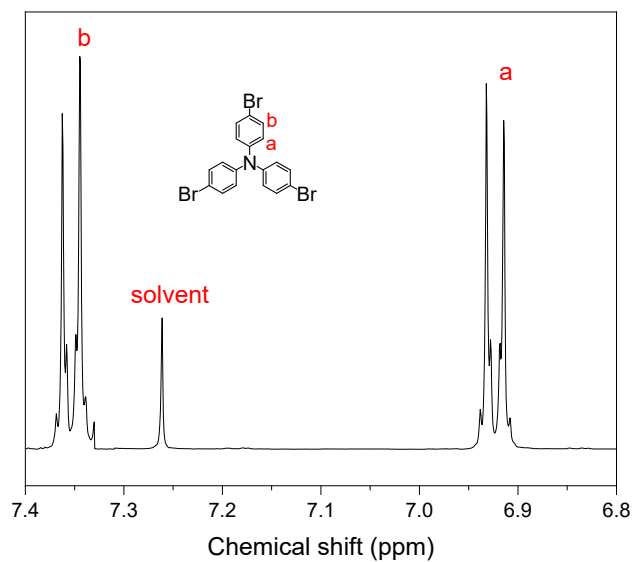

Fig. S7  $^1\text{H}$  NMR of TPA-3Br

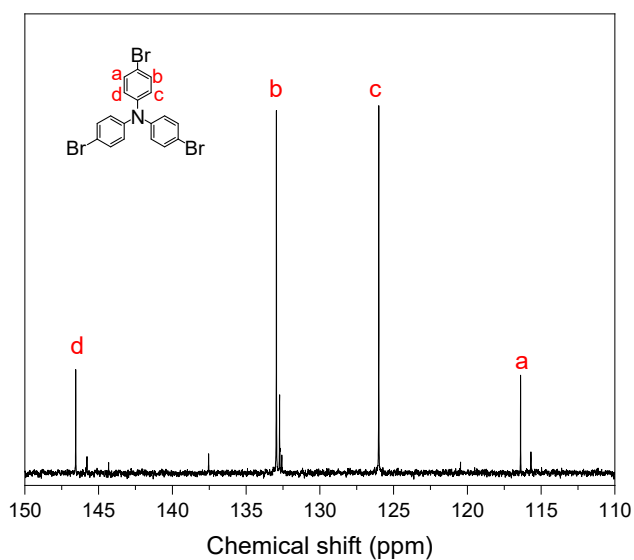

Fig. S8  $^{13}\text{C}$  NMR of TPA-3Br

### S.2.1 Synthesis of 4,7-di(thiophen-2-yl)benzo[c][1,2,5]thiadiazole (ThZ)

The 4,7-di(thiophen-2-yl)benzo[c][1,2,5]thiadiazole (ThZ) was designed via following the reported study as schemes briefly in [Scheme S3](#). The commercial 4,7-Dibromo-2,1,3-

benzothiadiazole (Tz-2Br) (750 mg, 2.551 mmol) with tetrakis(triphenylphosphine) palladium(0) (590 mg, 0.510 mmol) were intermixed in a round flask which then degassed for 15 min. Afterwards, the reaction was continued after the injection of dry *N,N*-Dimethylformamide (DMF, 10 mL) and 2-(tributylstannyl)thiophene (2.43 mL) under N<sub>2</sub> atmosphere. The flask was refluxed for 72 h at 120 °C under N<sub>2</sub> atmosphere under continues magnetic stirring. Finally, an orange precipitate was formed after solvent evaporation. The powder was finally purified employing the column chromatography via eluent of DCM/hexane (1:4 v/v). FTIR (KBr pellets): 2965, 1730, 1633, and 1261 cm<sup>-1</sup> (Fig. S9). <sup>1</sup>H NMR (400 MHz, 25 °C): δ = 8.13 (*d*, 2H), 7.88 (*s*, 2H), 7.47 (*d*, 2H) and 7.20 (*m*, 2H) ppm (Fig. S10). The melting point was recorded as 120-122 °C.

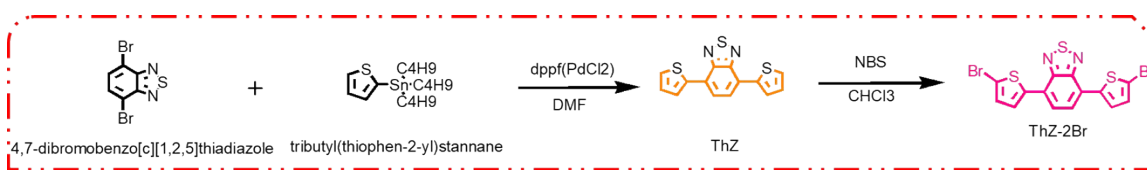

*Scheme S3 Schematic design of ThZ, and ThZ-2Br.*

### *S.2.2 Synthesis of 4,7-bis(5-bromothiophen-2-yl)benzo[c][1,2,5]thiadiazole (ThZ-2Br)*

According to the previous report,<sup>1</sup> 4,7-bis(5-bromothiophen-2-yl)benzo[c][1,2,5]thiadiazole (ThZ-2Br) was also designed employing the above synthesized ThZ (637 mg, 2.12 mmol) after dissolving it into a 50 mL chloroform which then mixed with *N*-bromosuccinimide (831 mg) in a couple-neck flask in dark environment. The reaction was conducted in the dark, under N<sub>2</sub> stream, and at an ambient temperature for 3 nights. Finally, the powder was separated, rinsed as well with water, methanol, and chloroform. The yielded red powder was dried under vacuum overnight. <sup>1</sup>H NMR (400 MHz, 25 °C): δ = 7.82 (*d*, 2H), 7.81 (*s*, 2H), and 7.17 (*d*, 2H) ppm (Fig. S11). The melting point was recorded to be 252-254 °C.

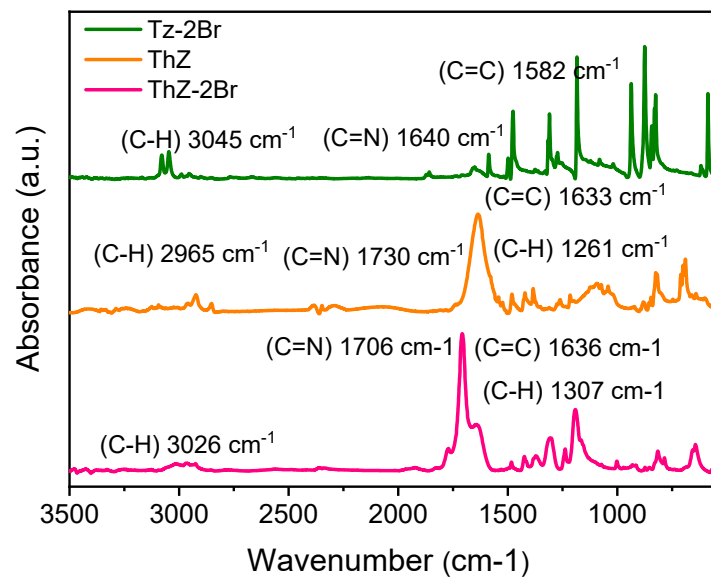

Fig. S9 FTIR of pristine Tz-2Br, ThZ, and ThZ-2Br

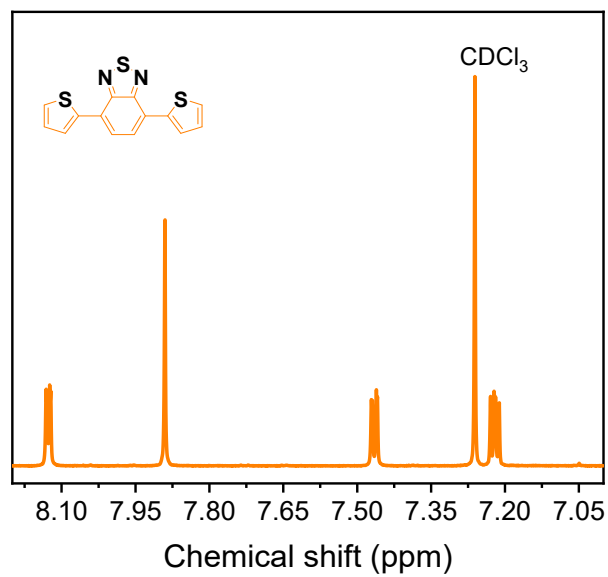

Fig. S10 <sup>1</sup>H NMR of the ThZ

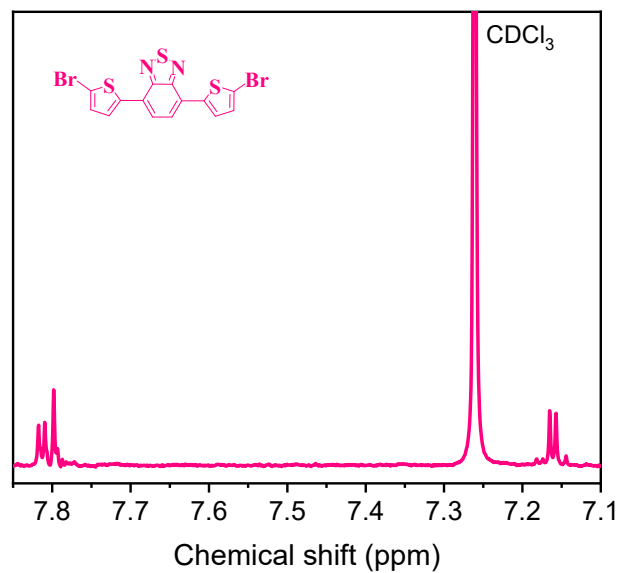

Fig. S11  $^1\text{H}$ NMR of the ThZ-2Br

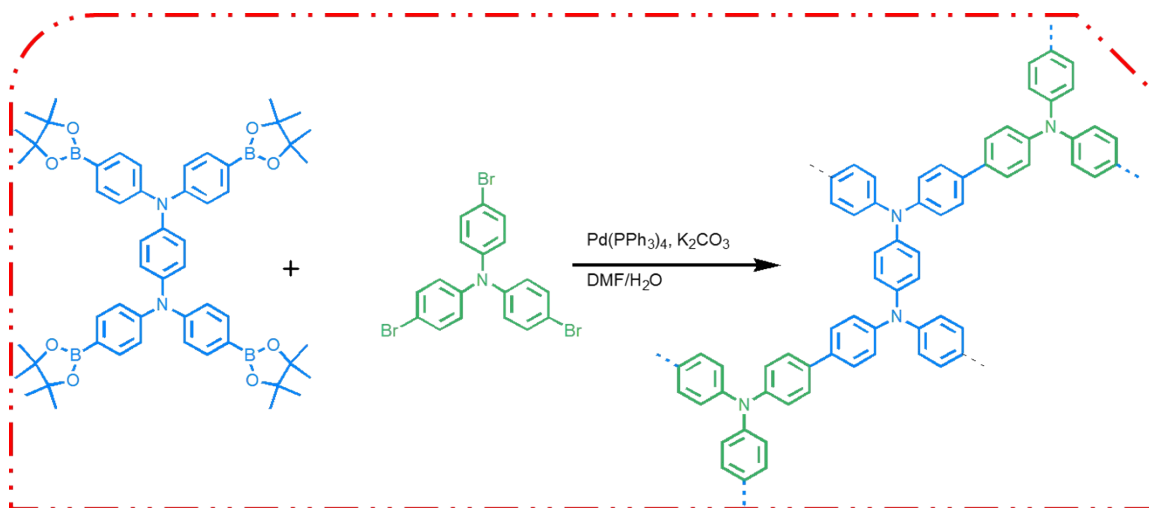

Scheme S4 Synthesis design of TPPDA-TPA CMP

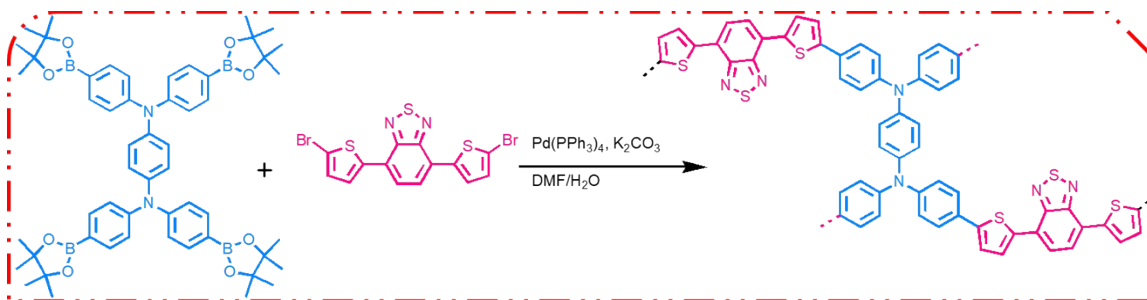

*Scheme S5 Schematic design of TPPDA-ThZ CMP*

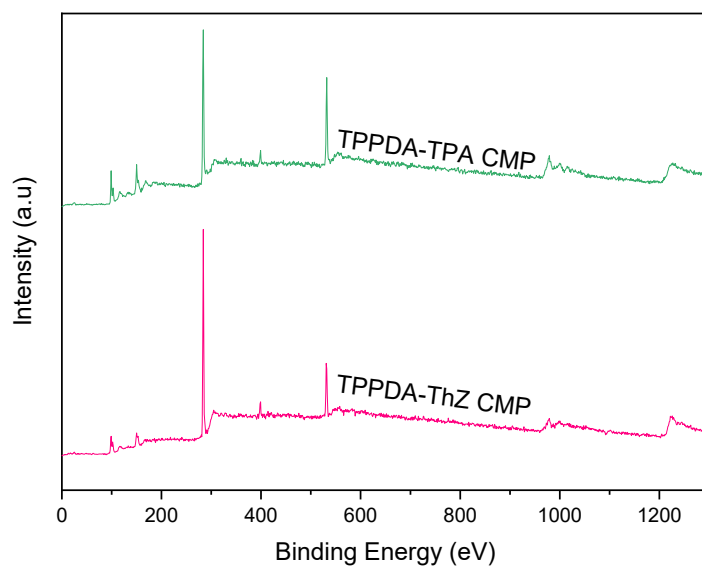

*Fig. S12 Wide-scan XPS of TPPDA-TPA, and TPPDA-ThZ CMPs*

Table S1 XPS fitting properties of TPPDA-TPA, and TPPDA-ThZ CMPs.

| Element    | Status             | Binding Energy (eV) | TPPDA-TPA CMP |          | TPPDA-ThZ CMP |          |
|------------|--------------------|---------------------|---------------|----------|---------------|----------|
|            |                    |                     | FWHM          | Area     | FWHM          | Area     |
| <b>C1s</b> | C=C                | 283.698             | 1.4           | 7476.945 | 0.93          | 5368.317 |
|            | C=N                | 284.188             | 1.69          | 751.6447 | 0.84          | 4390.3   |
|            | C-OH               | 284.75              | 1.58          | 2223.07  | 1.12          | 1701.041 |
|            | C=O or C-S         | 287.5399            | 3.96          | 687.568  | 0.86          | 224.93   |
|            |                    |                     |               |          |               |          |
| <b>N1s</b> | N-C                | 398                 | 1.34          | 642.4345 | 1.377         | 187.38   |
|            | N-S                | 398.136             |               |          | 0.95          | 332.86   |
|            | N <sub>2</sub>     | 399.1               | 1.3           | 128.6982 | 1.63          | 282.2966 |
| <b>O1s</b> | O-S                | 530.99              |               |          | 1.73          | 1823.45  |
|            | O=C                | 531.6               | 1.42          | 2511.272 | 1.335         | 1621.45  |
|            | C-OH               | 532.399             | 1.71          | 3764.766 | 1.15          | 732.12   |
| <b>S2p</b> | C-S                | 163.399             |               |          | 3.82          | 81.685   |
|            | S2p <sub>3/2</sub> | 164.9               |               |          | 3.0778        | 211.22   |
|            | S-O                | 167.699             |               |          | 2.8           | 353.699  |
|            | S2P1/2             | 168.799             |               |          | 3.88          | 193.565  |

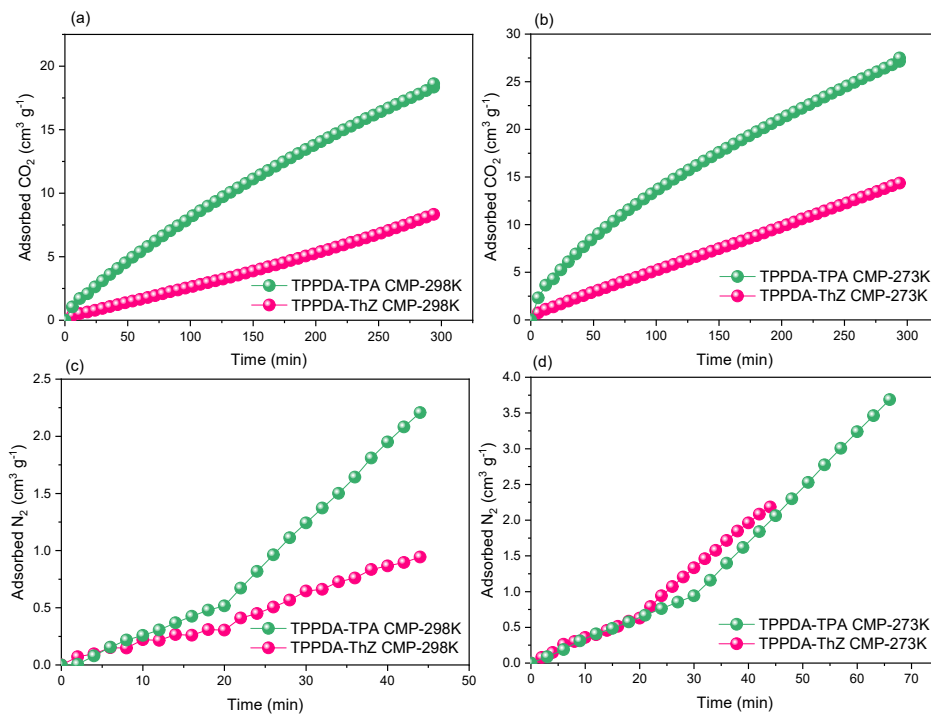

*Fig. S 13 Time dependent relationships of CO<sub>2</sub> (a, b), and N<sub>2</sub> (a, b) uptake onto TPPDA-TPA, and TPPDA-ThZ CMPs at 298 K, and 273 K.*

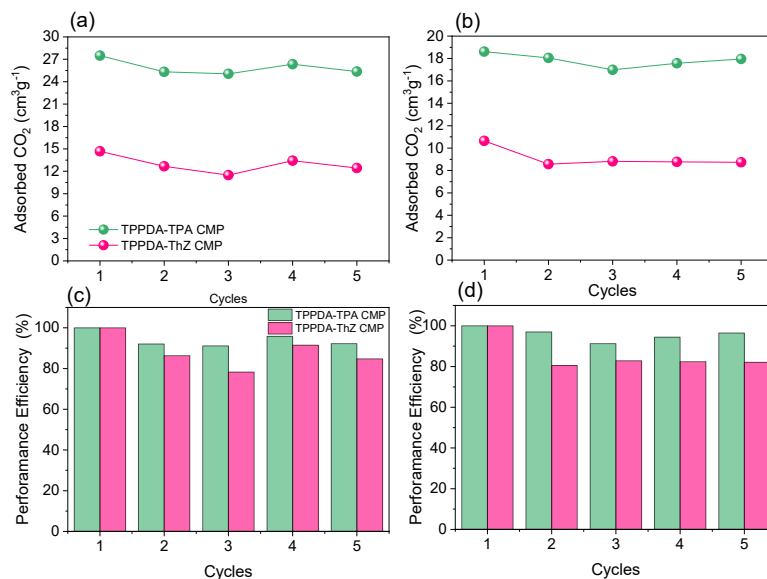

*Fig. S 14 Adsorption capacities of CO<sub>2</sub> utilizing those TPPDA-TPA, and TPPDA-ThZ CMP at 273 K (a) and 298 K (b) respectively over five runs. Performance Efficiency of TPPDA-TPA, and TPPDA-ThZ CMP at 273 K (c) and 298 K (d) respectively.*

*Table S2 The CO<sub>2</sub>, N<sub>2</sub> uptakes, selectivity, and isosteric heats at various pressures using TPPDA-TPA, and TPPDA-ThZ CMPs*

| Sample        | CO <sub>2</sub> uptake             |       | N <sub>2</sub> uptake              |       | Selectivity                     |       | Qst of CO <sub>2</sub> uptake (KJ mol <sup>-1</sup> ) |       | Qst of N <sub>2</sub> uptake (KJ mol <sup>-1</sup> ) |       |
|---------------|------------------------------------|-------|------------------------------------|-------|---------------------------------|-------|-------------------------------------------------------|-------|------------------------------------------------------|-------|
|               | (cm <sup>3</sup> g <sup>-1</sup> ) |       | (cm <sup>3</sup> g <sup>-1</sup> ) |       | CO <sub>2</sub> /N <sub>2</sub> |       |                                                       |       |                                                      |       |
|               | 273 K                              | 298 K | 273 K                              | 298 K | 273 K                           | 298 K | 0.1                                                   | 0.4   | 0.005                                                | 0.04  |
|               |                                    |       |                                    |       |                                 |       | bar                                                   | bar   | bar                                                  | bar   |
| TPPDA-TPA CMP | 27.49                              | 18.6  | 3.686                              | 2.207 | 7.47                            | 8.433 | 24.04                                                 | 20.44 | 26.7                                                 | 15.39 |
| TPPDA-ThZ CMP | 14.67                              | 8.81  | 2.184                              | 0.944 | 6.72                            | 9.333 | 23.26                                                 | 13.75 | 10.34                                                | 27.67 |

*Table S3 Comparative study of TPPDA-TPA, and TPPDA-ThZ CMPs for CO<sub>2</sub> adsorption with earlier reported porous materials.*

| Sample                                                  | CO <sub>2</sub> uptake (mmol/g) |       | Ref. |
|---------------------------------------------------------|---------------------------------|-------|------|
|                                                         | 273 K                           | 298 K |      |
| <b>RLF-500</b>                                          | 3.13                            | --    | 2    |
| <b>ELF6</b>                                             | 3.29                            | --    | 3    |
| <b>ELF46</b>                                            | 2.46                            | --    | 3    |
| <b>PECONF-1</b>                                         | 1.86                            | 1.34  | 4    |
| <b>PECONF-2</b>                                         | 2.85                            | 1.98  | 4    |
| <b>PECONF-4</b>                                         | 2.95                            | 1.96  | 4    |
| <b>BPOP-1</b>                                           | 1.79                            | 0.98  | 5    |
| <b>BPOP-2</b>                                           | 1.45                            | 0.67  | 5    |
| <b>COF-102</b>                                          | 1.56                            | --    | 6    |
| <b>Fc-CMP-1</b>                                         | 1.45                            | --    | 7    |
| <b>BoxPOP-1</b>                                         | --                              | 0.91  | 8    |
| <b>BoxPOP-2</b>                                         | --                              | 1.04  | 8    |
| <b>BoxPOP-3</b>                                         | --                              | 0.29  | 8    |
| <b>Co<sub>3</sub>(BTB)<sub>2</sub>(DMA)<sub>4</sub></b> | --                              | 0.678 | 9    |
| <b>PP1-2-TAEA</b>                                       | 1.13                            | --    | 10   |
| <b>CHIT</b>                                             | --                              | 0.1   | 11   |
| <b>CHIT-HTC-12</b>                                      | --                              | 0.1   | 11   |
| <b>CHIT-HTC-24</b>                                      | --                              | 0.3   | 11   |
| <b>CHIT-HTC-48</b>                                      | --                              | 0.45  | 11   |
| <b>BGM</b>                                              | --                              | 0.247 | 12   |

|                      |      |                           |            |
|----------------------|------|---------------------------|------------|
| <b>BGM2</b>          | --   | 0.252                     | 12         |
| <b>BGM6</b>          | --   | 0.295                     | 12         |
| <b>BGM10</b>         | --   | 0.581                     | 12         |
| <b>ISM-1</b>         | --   | 5 (mg g <sup>-1</sup> )   | 13         |
| <b>ISM-5</b>         | --   | 9.3 (mg g <sup>-1</sup> ) | 13         |
| <b>AlPor-PIP-Br</b>  | 1.3  | --                        | 14         |
| <b>PE-SBA-15</b>     | --   | 0.27                      | 15         |
| <b>TPPDA-TPA CMP</b> | 1.27 | 0.83                      | This study |
| <b>TPPDA-ThZ CMP</b> | 0.65 | 0.39                      |            |

### S3 References

- 1 M. G. Kotp, N. L. Torad, H. Nara, W. Chaikittisilp, J. You, Y. Yamauchi, A. F. M. El-Mahdy and S.-W. Kuo, Tunable Thiophene-Based Conjugated Microporous Polymers for the Disposal of Toxic Hexavalent Chromium, *J. Mater. Chem. A*, 2023, **11**, 15022-15032.
- 2 G. P. Hao, W. C. Li, D. Qian and A. H. Lu, Rapid synthesis of nitrogen-doped porous carbon monolith for CO<sub>2</sub> capture, *Adv. Mater.*, 2010, **22**, 853-857.
- 3 W. Shi, X. Zhang, Y. Ji, Z. Zhao, W. Li and X. Jia, Sustainable preparation of bio-based polybenzoxazine resins from amino acid and their application in CO<sub>2</sub> adsorption, *ACS Sustain. Chem. Eng. ACS*, 2019, **7**, 17313-17324.
- 4 P. Mohanty, L. D. Kull and K. Landskron, Porous covalent electron-rich organonitridic frameworks as highly selective sorbents for methane and carbon dioxide, *Nat. Commun*, 2011, **2**, 401.
- 5 X. Sun, J. Li, W. Wang and Q. Ma, Constructing benzoxazine-containing porous organic polymers for carbon dioxide and hydrogen sorption, *Eur. Polym. J.*, 2018, **107**, 89-95.
- 6 H. Furukawa and O. M. Yaghi, Storage of hydrogen, methane, and carbon dioxide in highly porous covalent organic frameworks for clean energy applications, *J. Am. Chem. Soc.*, 2009, **131**, 8875-8883.
- 7 G. Li, Q. Liu, B. Liao, L. Chen, H. Zhou, Z. Zhou, B. Xia, J. Huang and B. Liu, Synthesis of novel ferrocene-based conjugated microporous polymers with intrinsic magnetism, *Eur. Polym. J.*, 2017, **93**, 556-560.
- 8 S. Xu, J. He, S. Jin and B. Tan, Heteroatom-rich porous organic polymers constructed by benzoxazine linkage with high carbon dioxide adsorption affinity, *J. Colloid Interface Sci.*, 2018, **509**, 457-462.

- 9 D. Kim, X. Song, J. H. Yoon and M. S. Lah, 3, 6-Connected metal–organic frameworks based on triscarboxylate as a 3-connected organic node and a linear trinuclear Co<sub>3</sub> (COO)<sub>6</sub> secondary building unit as a 6-connected node, *Cryst. Growth Des.*, 2012, **12**, 4186-4193.
- 10 T. Shi, Z. Wu, Z. Wu, Q. F. Zhang, M. Strømme and C. Xu, Postsynthetic amine modification of porous organic polymers for CO<sub>2</sub> capture and separation, *Journal of Polymer Science*, 2024, **62**, 1554-1568.
- 11 J. A. Chagas, G. O. Crispim, B. P. Pinto, R. A. San Gil and C. J. Mota, Synthesis, characterization, and CO<sub>2</sub> uptake of adsorbents prepared by hydrothermal carbonization of chitosan, *ACS omega*, 2020, **5**, 29520-29529.
- 12 M. Mirković, M. S. Yilmaz, L. Kljajević, V. Pavlović, M. Ivanović, D. Djukić and T. Eren, Design of PEI and amine modified metakaolin-brushite hybrid polymeric composite materials for CO<sub>2</sub> capturing, *Polymers*, 2023, **15**, 1669.
- 13 K. Cai, P. Liu, Z. Chen, P. Chen, F. Liu, T. Zhao and D.-J. Tao, Construction of bifunctional triazine-based imidazolium porous ionomer polymers by a post-crosslinking tactic for efficient CO<sub>2</sub> capture and conversion, *Chem. Eng. J.*, 2023, **451**, 138946.
- 14 X. Liu, Y. Yang, M. Chen, W. Xu, K. Chen and R. Luo, High-surface-area metalloporphyrin-based porous ionic polymers by the direct condensation strategy for enhanced CO<sub>2</sub> capture and catalytic conversion into cyclic carbonates, *ACS Appl. Mater. Interfaces*, 2022, **15**, 1085-1096.
- 15 A. A. Al-Absi, A. Domin, M. Mohamedali, A. M. Benneker and N. Mahinpey, CO<sub>2</sub> capture using in-situ polymerized amines into pore-expanded-SBA-15: Performance evaluation, kinetics, and adsorption isotherms, *Fuel*, 2023, **333**, 126401.
